# Supplementary material for: Ca2+ entry via TRPC1 is essential for cellular differentiation and modulates secretion via the SNARE complex
Source: PubMed Central journal article supplement (PMC6633397; doi:10.1242/jcs.231878), 2019-07-01
Supplement: joces-132-231878-s1.pdf [file joces-132-231878-s1.pdf]

**Table S1. Antibody details.**

| <b>Antibody</b> | <b>Supplier</b>   | <b>Catolog</b> | <b>Dilution (v/v)</b> |
|-----------------|-------------------|----------------|-----------------------|
| Actin Cell      | Signaling         | 4970S          | 1:1000                |
| Adiponectin     | Abcam             | ab85827        | 1:1000                |
| FABP4           | Cell Signaling    | 3544T          | 1:1000                |
| Leptin          | Abcam             | ab9749         | 1:1000                |
| ORAI1           | Alomone Labs      | Acc-060        | 1:1000                |
| ORAI3           | Alomone Labs      | ACC-065        | 1:1000                |
| Perlipin        | Cell Signaling    | 9349T          | 1:1000                |
| PPAR $\gamma$   | Cell Signaling    | 2435T          | 1:1000                |
| SNAP25          | Syntaptic Systems | 111-002        | 1:10000               |
| STIM1           | Cell Signaling    | 4916s          | 1:1000                |
| Syntaxin1       | Syntaptic Systems | 110-101        | 1:10000               |
| TRPC1           | Alomone Labs      | ACC-010        | 1:500                 |
| TRPC3           | Alomone Labs      | ACC-016        | 1:200                 |
| TRPC5           | Alomone Labs      | ACC-020        | 1:200                 |
| VAMP2           | Syntaptic Systems | 104 202        | 1:10000               |
